# Supplementary material
Source: HighWire-hosted journal article supplement (https://bmjopen.bmj.com/content/9/6/e027528)
Supplement: inline-supplementary-material-1 [file inline-supplementary-material-1.pdf]

## Supplementary material

**Table S1:** Search terms used in the electronic data examination.

| Area covered                | Search terms                                                                                                                                                                                                                              |
|-----------------------------|-------------------------------------------------------------------------------------------------------------------------------------------------------------------------------------------------------------------------------------------|
| Socioeconomic circumstances | ("socioeconomic factors" OR "socioeconomic position" OR "social class" OR "socioeconomic determinants" OR "socioeconomic class" OR poverty OR education OR income OR occupation OR wealth OR deprivation OR overcrowding OR unemployment) |
| Respiratory function        | ("Lung function" OR spirometry OR "FEV1" OR "Forced Expiratory Volume" OR "Forced Vital Capacity" OR "FVC" OR "pulmonary function" OR "respiratory function" OR "total lung capacity" OR tlc)                                             |
| Early life                  | (infant OR child* OR "preschool child*" OR adolesc* OR youth OR teenager OR young OR "young adult")                                                                                                                                       |

### **Text S1: Newcastle - Ottawa quality assessment scale for cohort studies**

Note: A study can be awarded a maximum of one star for each numbered item within the Selection and Outcome categories. A maximum of two stars can be given for Comparability

#### **Selection**

- 1) Representativeness of the exposed cohort
- 2) Selection of the non-exposed cohort
- 3) Ascertainment of exposure
- 4) Demonstration that outcome of interest was not present at start of study

#### **Comparability**

- 1) Comparability of cohorts on the basis of the design or analysis

#### **Outcome**

- 1) Assessment of outcome
- 2) Was follow-up long enough for outcomes to occur
- 3) Adequacy of follow up of cohorts

### **Text S2: Newcastle - Ottawa quality assessment scale adapted for cross-sectional association studies**

#### **Selection**

- 1) Representativeness of the exposed cohort
- 2) Selection of the non-exposed cohort
- 3) Ascertainment of exposure

#### **Comparability**

- 1) Comparability of cohorts on the basis of the design or analysis

#### **Associated factor**

- 1) Assessment of associated factor

**Table S2a:** Quality assessment of the cohort studies included, using the Newcastle-Ottawa scale.

[illegible]

**Table S2b:** Quality assessment of the cross-sectional studies included, using the Newcastle-Ottawa scale.

| Cross-sectional studies*        | Selection                                    |                                        |                              | Comparability                                                                                           |                                              | Associated factor                  | Total |
|---------------------------------|----------------------------------------------|----------------------------------------|------------------------------|---------------------------------------------------------------------------------------------------------|----------------------------------------------|------------------------------------|-------|
| Reference, year                 | 1 - Representativeness of the Exposed Cohort | 2- Selection of the Non-Exposed Cohort | 3- Ascertainment of Exposure | 1-Comparability of cohorts on the basis of the design or analysis<br>a) studies control for 1-2 factors | b) studies control for any additional factor | 1) Assessment of associated factor |       |
| Goren & Goldsmith, 1986         | 0                                            | 1                                      | 0                            | 0                                                                                                       | 0                                            | 1                                  | 2/6   |
| Kauffmann <i>et al.</i> , 1989  | 0                                            | 1                                      | 1                            | 0                                                                                                       | 0                                            | 1                                  | 4/6   |
| Azizi & Henry, 1990             | 0                                            | 1                                      | 0                            | 1                                                                                                       | 1                                            | 1                                  | 4/6   |
| Demissie <i>et al.</i> , 1996   | 0                                            | 1                                      | 0                            | 1                                                                                                       | 1                                            | 1                                  | 4/6   |
| Lercher & Schmitzberger, 1997   | 0                                            | 1                                      | 1                            | 1                                                                                                       | 1                                            | 1                                  | 5/6   |
| Harik-Khan <i>et al.</i> , 2004 | 1                                            | 1                                      | 1                            | 0                                                                                                       | 0                                            | 1                                  | 5/6   |
| Raju <i>et al.</i> , 2005       | 1                                            | 1                                      | 1                            | 1                                                                                                       | 1                                            | 1                                  | 6/6   |
| Bennett <i>et al.</i> , 2008    | 0                                            | 1                                      | 0                            | 1                                                                                                       | 1                                            | 1                                  | 4/6   |
| Suglia <i>et al.</i> , 2008     | 1                                            | 1                                      | 0                            | 1                                                                                                       | 1                                            | 1                                  | 5/6   |
| Trabelsi <i>et al.</i> , 2008   | 1                                            | 1                                      | 0                            | 0                                                                                                       | 0                                            | 1                                  | 3/6   |
| Slachtova <i>et al.</i> , 2011  | 1                                            | 1                                      | 1                            | 1                                                                                                       | 1                                            | 1                                  | 6/6   |
| Wu <i>et al.</i> , 2012         | 0                                            | 1                                      | 1                            | 1                                                                                                       | 1                                            | 1                                  | 5/6   |
| Rebacz-Marón & Parafiniuk, 2014 | 0                                            | 1                                      | 0                            | 1                                                                                                       | 1                                            | 1                                  | 4/6   |
| Siniarska <i>et al.</i> , 2014  | 0                                            | 1                                      | 1                            | 1                                                                                                       | 1                                            | 1                                  | 5/6   |
| Cakmak <i>et al.</i> , 2016     | 0                                            | 1                                      | 1                            | 1                                                                                                       | 1                                            | 0                                  | 4/6   |
| Lum <i>et al.</i> , 2016        | 0                                            | 1                                      | 1                            | 0                                                                                                       | 0                                            | 1                                  | 4/6   |
| Kuti <i>et al.</i> , 2017       | 1                                            | 1                                      | 1                            | 0                                                                                                       | 0                                            | 1                                  | 4/6   |
| Nowakowski <i>et al.</i> , 2017 | 0                                            | 1                                      | 1                            | 0                                                                                                       | 0                                            | 1                                  | 4/6   |
| Saad <i>et al.</i> , 2017       | 0                                            | 1                                      | 1                            | 1                                                                                                       | 1                                            | 1                                  | 5/6   |
